# Supplementary material
Source: PubMed Central journal article supplement (PMC7116736)

---

**Supplementary information**

---

**Biomolecular condensation of NUP98 fusion proteins drives leukemogenic gene expression**

---

In the format provided by the authors and unedited

**Supplementary Table 3: Summary of all analyses to assess correlation and co-occurrence in co-localization studies of NUP98-KDM5A with RAE1 or DDX24 (related to Figure 2e and Extended Data Figure 2c)**

| staining:                           | NUP98-KDM5A mock |                   |         | NUP98-KDM5A mock DDX2 |       |         |
|-------------------------------------|------------------|-------------------|---------|-----------------------|-------|---------|
|                                     | RAE1             | RAE1              | p-value | DDX24                 | 4     | p-value |
| Spearman's Rank                     | 0,155            | 0,071             | <0.0001 | 0,355                 | 0,049 | <0.0001 |
| Kendall's Tau                       | 0,131            | 0,061             | <0.0001 | 0,285                 | 0,04  | <0.0001 |
| n=6                                 |                  |                   |         |                       |       |         |
| staining                            | NUP98-KDM5A RAE1 | NUP98-KDM5A DDX24 |         |                       |       |         |
| Costes p<br>(200<br>Randomizations) | 1                | 1                 |         |                       |       |         |

## Supplementary Note

### RT-qPCR primer

| qPCR primer     | sequence              |
|-----------------|-----------------------|
| Gapdh_mouse_fw  | AGAAGGTGGTGAAGCAGGCAT |
| Gapdh_mouse_rev | CGGCATCGAAGGTGGAAGAGT |
| GAPDH_human_fw  | TGCACCACCAACTGCTTAGC  |
| GAPDH_human_rev | GGCATGGACTGTGGTCATGAG |
| NUP98-KDM5A_fw  | GTTCTCCAGCAGCACATCAA  |
| NUP98-KDM5A_rev | CCGTTTCCGTTTCTTCTCTG  |

### Nucleotide sequences for artAA-KDM5A and artFG-KDM5A

>cDNA|artAA-KDM5A

CCAAAAAAGAAGAGAAAGGTAGAAGACCCCGCTGCAGCCGCGGCCGCAACTAAGCTTCAG  
GCCGGCACCGGCAACACCGGCAACAGCCCGCCAGCACATCCGCAGCCGCTGCCGCTGC

TACCGGTACCAAGAGCCAGACCAACAGCGGCAACGGCCTGACCCCCGCCGCCAGCGCTG  
CTGCTGCAGCAGCTCAGAACAAGAGCTCGGGCGCCGCCACCAACACCCCCCTTGGCGGA  
AGCACTACGGCTGCGGCGCCGCTGCGAAGCTTAACAGCAACCAGGGCGCCACCGGATC  
CACTGGCACCCCCGCCACCAGTGCCGCGGCTGCAGCTGCAACCCAGAACAAGCCCACCA  
GCGGCACCAGCGCCGCTAACGGCCTGAGCACCGGCGCTGCCGCTGCTGCTGCAAACGGC  
AGCGGCACCAAGAGCGCCCAGCTGAACGCCACCGGCAGCACCCCCACCGCTGCAGCTGC  
CGCCGCTACCGCTAGCACCCCCAGACCAGCAACGCCGGCGGCAGCAAGACCGGCCTGA  
ACGCGGCTGCTGCAGCTGCGCTGACCCAGAAGGGCCCCGCCAGCACCAACGGCAGCAAC  
GGCACCACTCCGCTGCTGCAGCTGCGGCTGCTGCCAAGAGCAACGGCGGATCCACCCT  
GCCCGGTACCACCGCCAGCACCAACCAGGCTGCCGCTGCAGCTGCTCTGAACACCAGCA  
GCCAGAGCGGCACCACCGCCACCGCCAAGGGCAACGGACCCGCTGCTGCCGCCGCTGCA  
AGCCAGGCCGGCAAGACCAGCGCCACCACCAACACCAACCCCCGGCCTGGGCAGCGCTGC  
AGCTGCGGCTGCGAACAGCAAGGGCCAGGCCGGCAACGGCGCCACCACCCCCCTGAGCT  
CGACCACCGCTGCGGCTGCAGCTGCATTGATGACAGCATGGAAGAGAAACCACTAAAAG  
TGAAAGGAAAGGACTCTTCAGAGAAGAAACGGAAACGGAAGCTAGAAAAGGTAGAGCAACT  
TTTTGGAGAAGGAAAACAGAAGTCCAAGGAGTTAAAGAAAATGGACAAACCTAGAAAGAAG  
AAATTAATAATTAGGTGCAGACAAATCAAAGGAGCTGAATAAACTGGCCAAGAACTAGCAAA  
AGAAGAAGAGAGAAAGAAAAAGAAGGAGAAGGCTGCTGCAGCCAAAGTTGAACTTGTGAAA  
GAGAGCACTGAAAAGAAAAGAGAGAAAAAGGTGCTGGACATCCCCTCAAAGTATGACTGGT  
CAGGAGCAGAGGAGTCTGATGATGAGAATGCTGTGTGCGCAGCACAGAACTGCCAAAGGC  
CCTGCAAGGACAAGGTAGACTGGGTACAATGTGATGGTGGCTGTGATGAGTGGTTTCATCA  
AGTTTGTGTGGGTGTATCTCCAGAAATGGCTGAAAATGAAGATTACATCTGTATAAACTGTG  
CAAAGAAGCAGGGGCCAGTTAGCCCAGGTCCAGCACCACTCCTTCCTTCATAATGAGCTA  
CAAACCTACCAATGGAGGATCTTAAAGAGACCAGTTA

>cDNA|artFG-KDM5A

CCAAAAAAGAAGAGAAAGGTAGAAGACCCCTTTGGATTTCGGGTTTCGGA ACTAAGCTTCAGG  
CCGGCACCCGGCAACACCCGGCAACAGCCCCGCCAGCACCTCCTTCGGCTTTGGCTTTGGTA  
CCGGTACCAAGAGCCAGACCAACAGCGGCAACGGCCTGACCCCGCCGCCAGCTTTGGTT  
TTGGATTTCGGTCAGAACAAGAGCTCGGGCGCCGCCACCAACACCCCCCTGGGCGGCAGC  
ACTACGTTTGGGTTTCGGCTTTGGGAAGCTTAACAGCAACCAGGGCGCCACCCGGATCCACT  
GGCACCCCGCCACCAGTTTCGGGTTTGGATTTGGAACCCAGAACAAGCCCACCAGCGGC  
ACCAGCGCCGCCAACGGCCTGAGCACCCGGCTTTGGCTTTGGTTTTGGAAACGGCAGCGGC  
ACCAAGAGCGCCCAGCTGAACGCCACCCGGCAGCACCCCCACCTTTGGATTTGGCTTCGGC  
ACCGCCAGCACCCCCAGACCAGCAACGCCGGCGGCAGCAAGACCGGCCTGAACTTCGG  
TTTTGGATTTGGGCTGACCCAGAAGGGCCCCGCCAGCACCAACGGCAGCAACGGCACCCAC  
CTCCGCTTTTGGATTTGGGTTTGGTGCCAAGAGCAACGGCGGATCCACCCTGCCCGGTAC  
CACCGCCAGCACCAACCAGTTTGGCTTTGGATTTGGTCTGAACACCAGCAGCCAGAGCGG  
CACCAACCGCCACCGCCAAGGGCAACGGCCCCTTTGGTTTTCGGCTTTGGAAGCCAGGCCG  
GCAAGACCAGCGCCACCACCAACCAACCCCGGCCTGGGCAGCTTTGGATTTGGGTTTG  
GGAACAGCAAGGGCCAGGCCGGCAACGGCGCCACCACCCCCCTGAGCTCGACCACCTTT  
GGGTTTGGATTTGGATTCGATGACAGCATGGAAGAGAAACCACTAAAAGTGAAAGGAAAGG  
ACTCTTCAGAGAAGAAACGGAAACGGAAAGCTAGAAAAGGTAGAGCAACTTTTTGGAGAAGG  
AAACAGAAAGTCCAAGGAGTTAAAGAAAATGGACAAACCTAGAAAGAAGAAATTAATAATTAG  
GTGCAGACAAATCAAAGGAGCTGAATAAACTGGCCAAGAACTAGCAAAGAAGAAGAGAG  
AAAGAAAAAGAAGGAGAAGGCTGCTGCAGCCAAAGTTGAACTTGTGAAAGAGAGCACTGAA  
AAGAAAAGAGAGAAAAAGGTGCTGGACATCCCCTCAAAGTATGACTGGTCAGGAGCAGAG  
GAGTCTGATGATGAGAATGCTGTGTGCGCAGCACAGAACTGCCAAAGGCCCTGCAAGGAC  
AAGGTAGACTGGGTACAATGTGATGGTGGCTGTGATGAGTGGTTTCATCAAGTTTGTGTGG  
GTGTATCTCCAGAAATGGCTGAAAATGAAGATTACATCTGTATAAACTGTGCAAAGAAGCAG  
GGGCCAGTTAGCCCAGGTCCAGCACCCACCTCCTTCCTTCATAATGAGCTACAAACTACCAA  
TGGAGGATCTTAAAGAGACCAGTTAG

### **Primary antibodies**

anti-HA.11 (BioLegend, 901513; 1:2000, RRID: AB\_2565335), anti-alpha Tubulin (Abcam, ab7291; 1:5000, RRID: AB\_2241126), anti-beta Actin (Cell Signaling, 4967S; 1:5000, RRID: AB\_330288), anti-HSC70 (Santa Cruz, sc-7298; 1:10000, RRID: AB\_627761), anti-NUP98 (Cell Signaling, #2288; 1:1000, RRID: AB\_561204), anti-RAE1 (Cell Signaling, sc-374261; 1:1000, RRID: AB\_11008069)

### **Secondary antibodies**

sheep anti-mouse HRP (GE Healthcare Austria GmbH & Co OG, NA931V; 1:10000, RRID: AB\_772210), goat anti-rabbit HRP (Cell Signaling, 7074; 1:10000, RRID: AB\_2099233) and imaged on a Vilber Fusion FX. For detection on the LI-COR Odyssey platform the following secondary antibodies (Thermo Fisher Scientific) were used: goat anti-mouse 800 (Cat# SA5-35521, 1:5000, RRID: AB\_2556774), goat anti-mouse 680 (Cat# A32729, 1:5000, RRID: AB\_2633278), goat anti-rabbit 800 (Cat# SA5-35571, 1:5000, RRID: AB\_2556775) or goat anti-rabbit 680 (Cat# A32734, 1:5000, RRID: AB\_2633283)

### **Protein network analysis: Figure 1 and S1**

The endogenous NUP98 interactome of mock-transduced HL-60 cells was background corrected by subtracting the CRaPome<sup>1</sup> using a cutoff of an average spectrum count (Ave SC) smaller than 10. The NUP98-KDM5A interactome was filtered for proteins that are enriched in Strep-Tactin pulldowns from mock-transduced cells. Specific interactors were identified based on a log<sub>2</sub> fold change greater than 0.5. Protein hubs were clustered based on String db interactions using K means clustering.

### **Protein network analysis: Figure 2**

The NUP98-fusion protein interactome was filtered for proteins that are enriched in Strep-Tactin pulldowns from mock-transduced cells. Specific interactors were identified based on a log<sub>2</sub> fold change greater than 0.5. The network was generated using Cytoscape 3.6.1<sup>2</sup> using the yFiles organic layout.

### **Protein network analysis: Figure 4**

biCon-MS data of mock-transduced HL-60 cells were filtered for proteins that are more abundant in 33 μM precipitates than in 11 μM precipitates. These proteins were subjected to ClueGO analysis with the following settings: Evidence codes used: All\_Experimental\_(EXP,IDA,IPI,IMP,IGI,IEP); Ontology used: GO\_BiologicalProcess-EBI-UniProt-GOA\_27.02.2019\_00h00; Merge redundant groups with >50.0% overlap; Statistical Test = Enrichment/Depletion (Two-sided hypergeometric test); Correction Method = Bonferroni step down. The protein list of the most significant hub (“gene expression”) was extracted and subjected to String db interaction analysis (cutoff 0.4) and clustered using Reactome FI based on String interactions.

### **Protein network analysis: Figure 5**

biCon-MS data of HL-60 cells expressing NUP98-KDM5A or NUP98-NSD1 were analyzed for proteins that are more abundant in 33 μM precipitates than in 11 μM precipitates. In a next step, these lists were compared to proteins that were precipitated in mock-transduced cells. All proteins that were enriched with a log<sub>2</sub> fold change greater than 1 were subjected to String db (cutoff 0.4) and Reactome FI analysis. The three most significantly enriched clusters are shown.

**Protein network analysis: Figure 6**

Dose-dependent proteins were identified by significant enrichment of 33  $\mu\text{M}$  precipitates compared to 11  $\mu\text{M}$  precipitates and only proteins with a log<sub>2</sub> fold change > 1 and a p-value < 0.05 were used for further comparisons. Proteins uniquely enriched in artFG-KDM5A precipitates compared to artAA-KDM5A were subjected to String db (cutoff 0.4) and Reactome FI analysis. The three most significantly enriched nuclear clusters are shown.

# Supplementary Figure 1. Full, uncropped scans of Western blots

Figure 2a

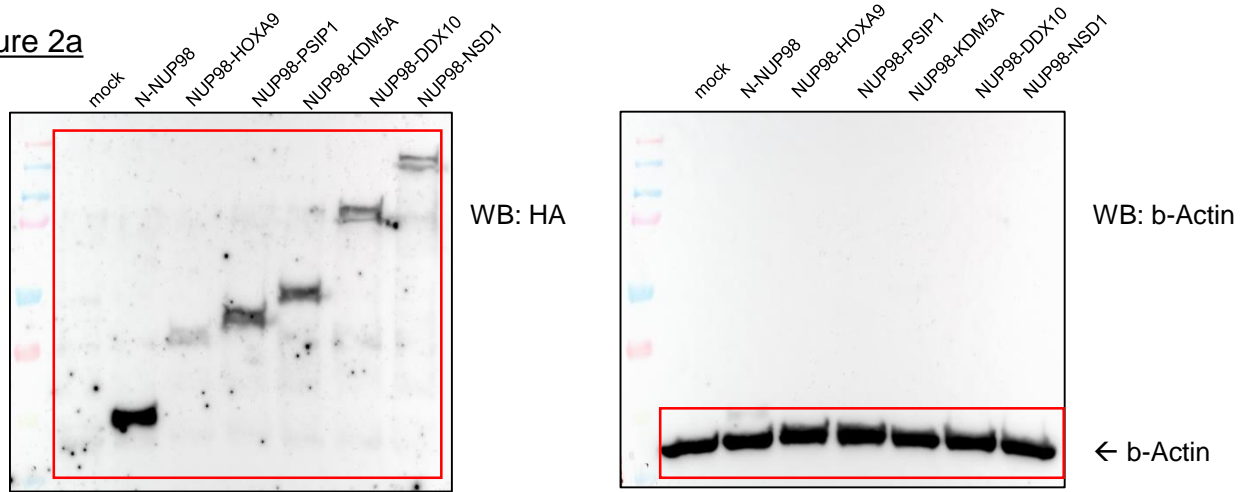

Figure 3d

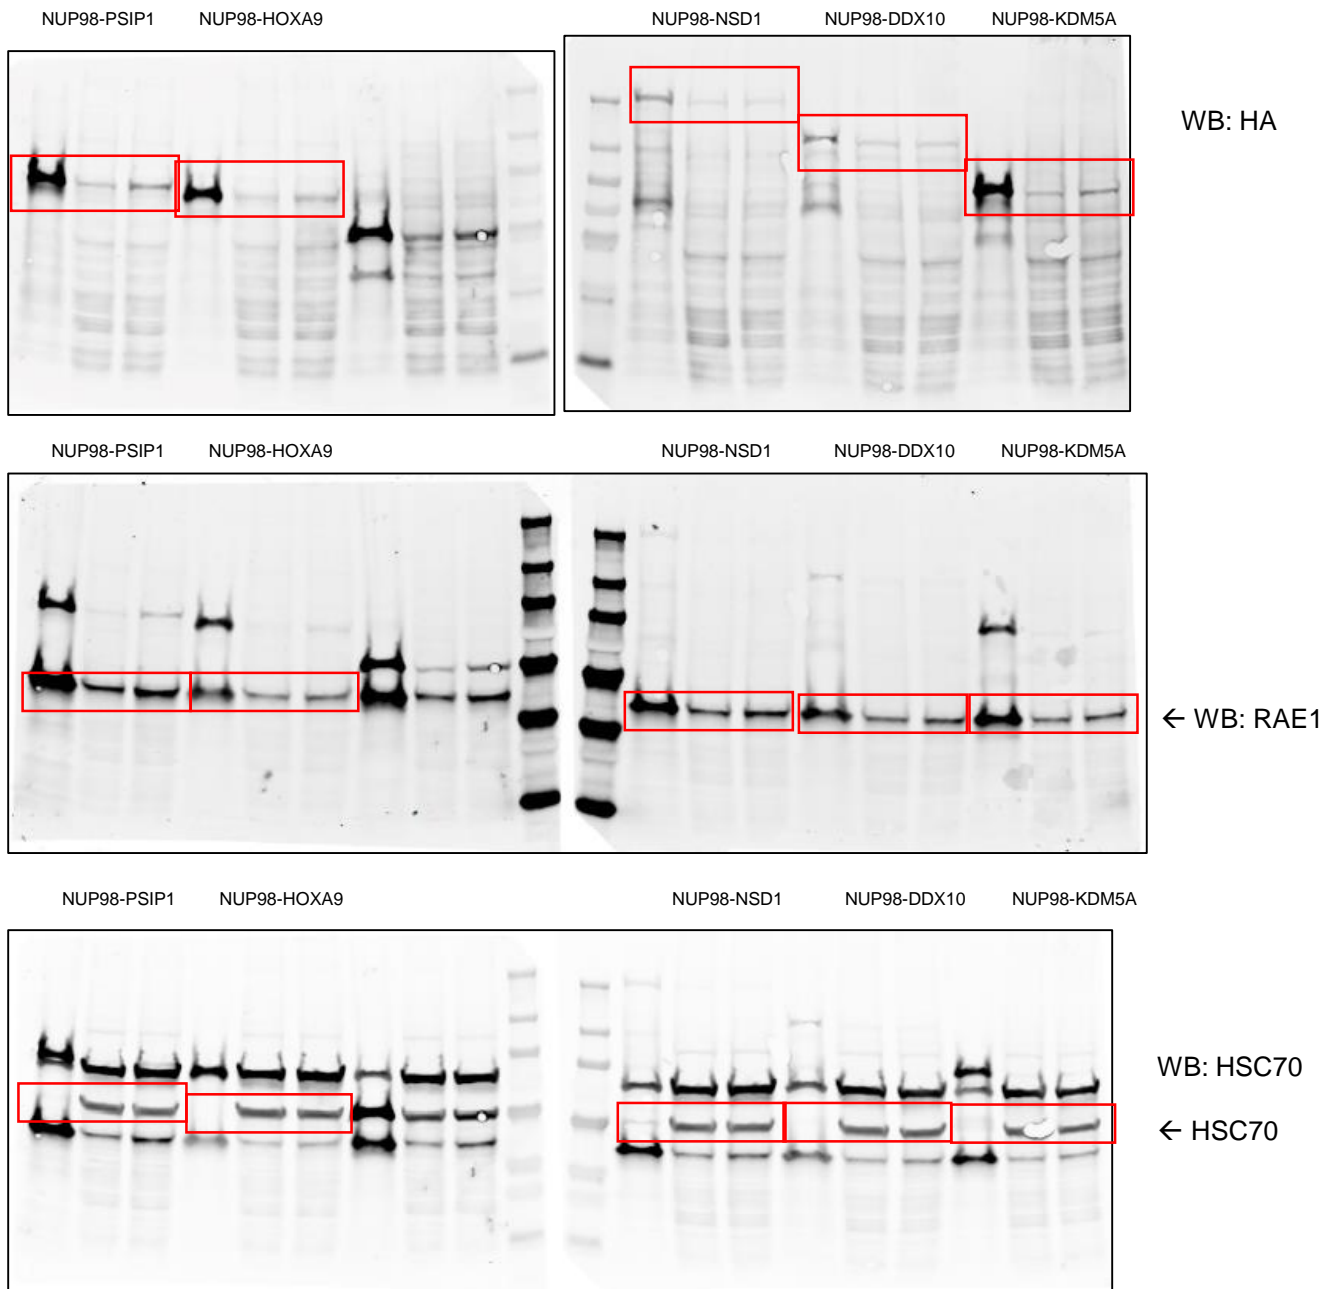



**Figure 4b**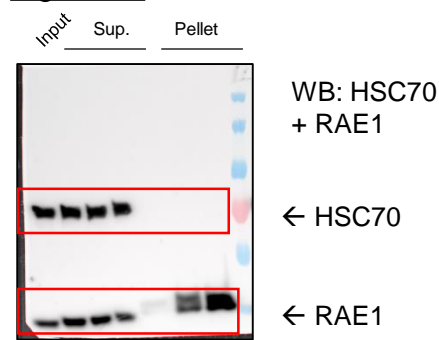**Figure 6b**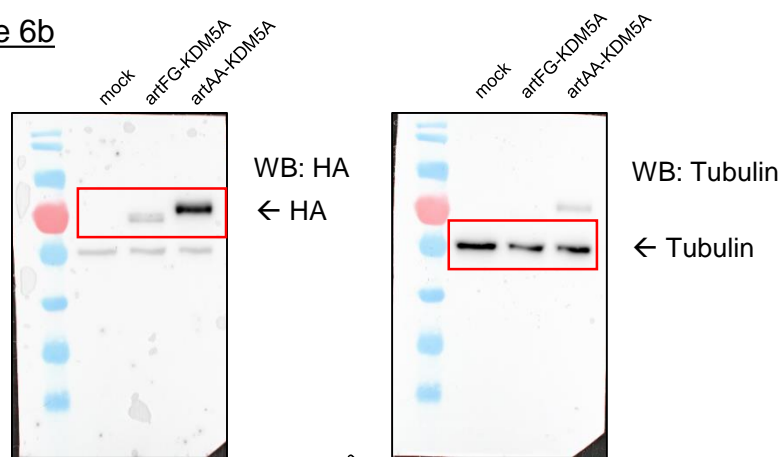**Extended Data Figure 1b**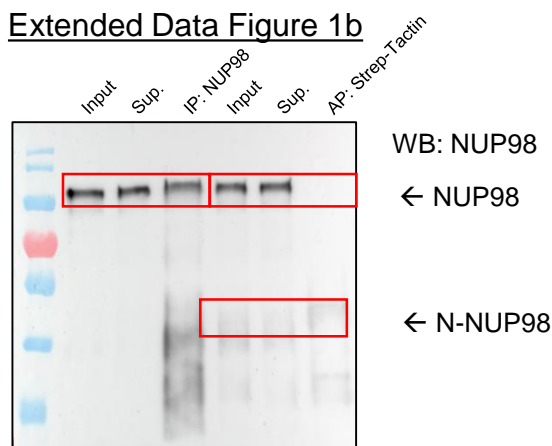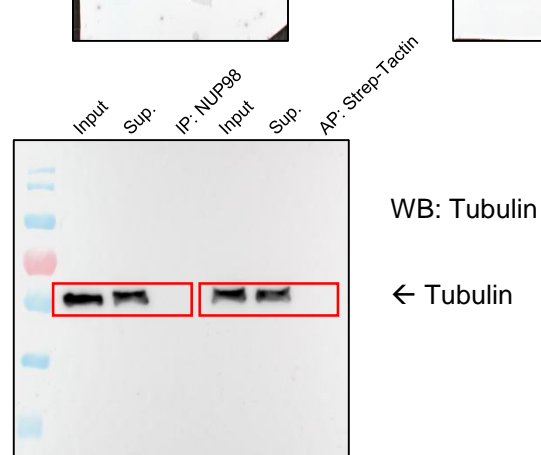**Extended Data Figure 2d**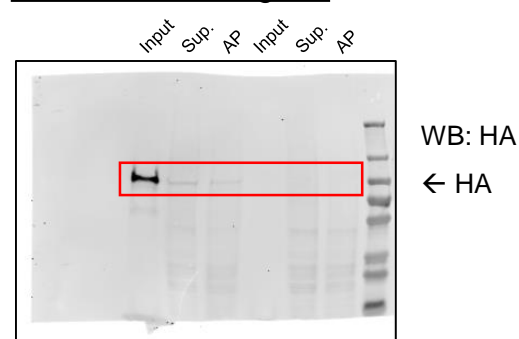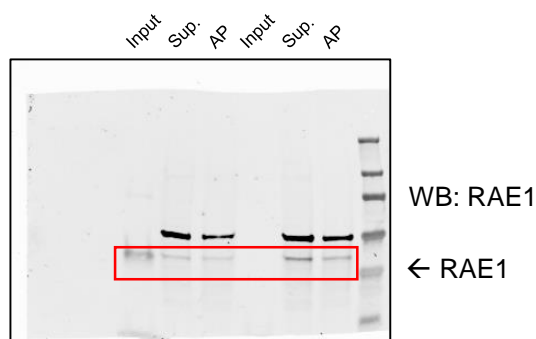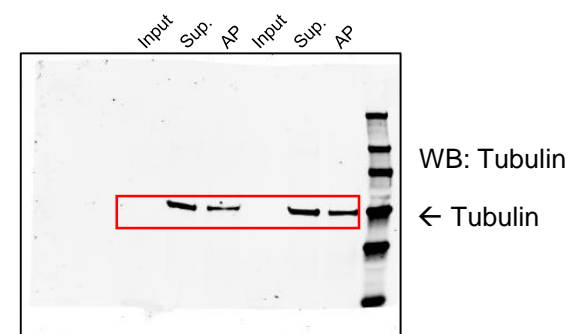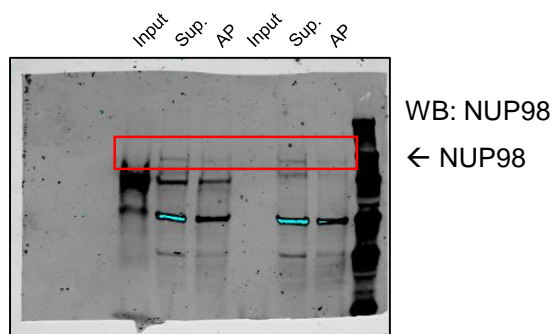**Extended Data Figure 3c**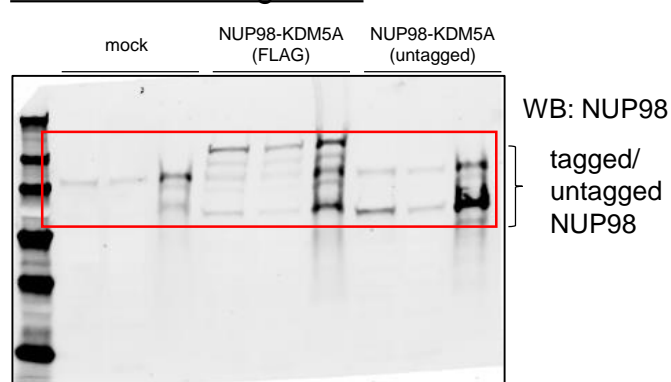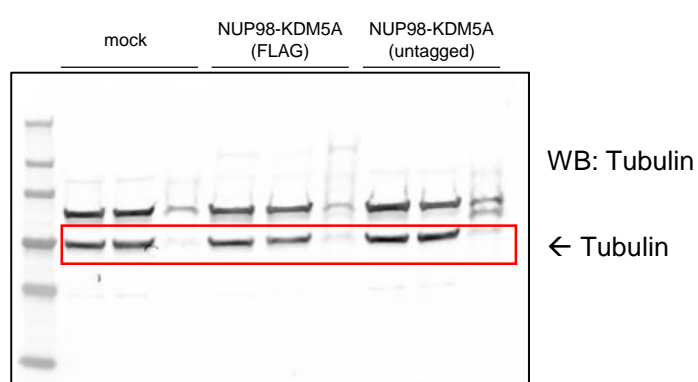

### Extended Data Figure 4a

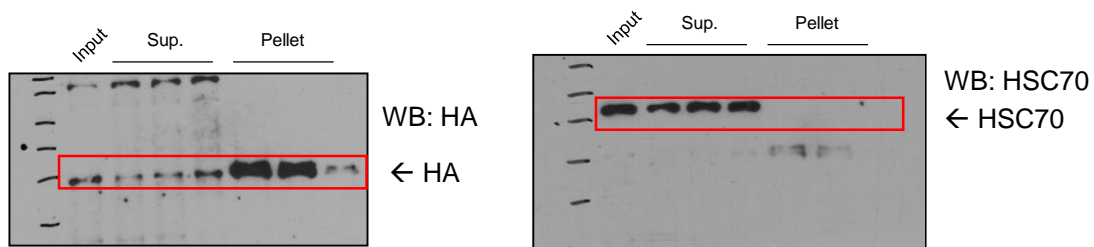

### Extended Data Figure 5c

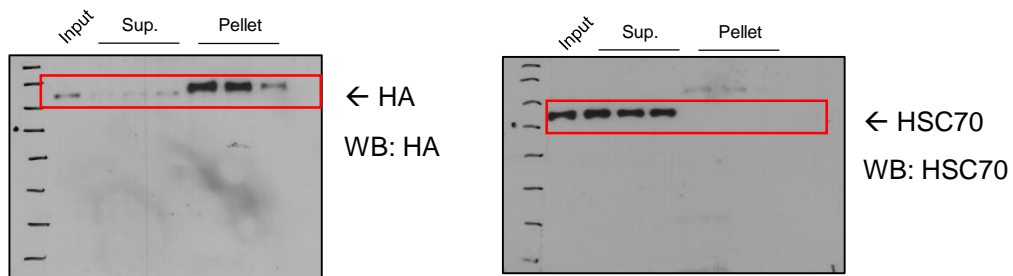

### Extended Data Figure 5d

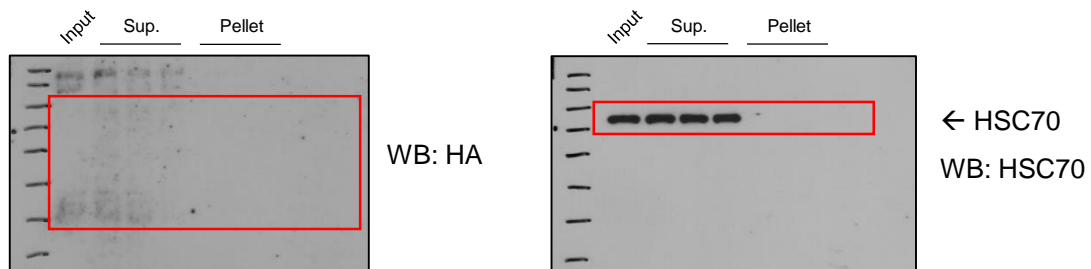

Supplement: EMS114448-supplement-Supplementary_information.pdf [file EMS114448-supplement-Supplementary_information.pdf]
